# Supplementary material
Source: Royal Society of Chemistry journal article supplement (doi:10.1039/d6nr00602g)
Supplement: d6nr00602g1.pdf [file d6nr00602g1.pdf]

## Supporting Information

### **Interfacial Charge Regulation in Solid-State UiO-67/ZnIn<sub>2</sub>S<sub>4</sub>/Pt Z-Scheme Heterojunctions for Efficient Photocatalytic Hydrogen Evolution**

Bolong Qi<sup>[1]</sup>, Rui Li<sup>[1]</sup>, Haoran Jiang<sup>[2]\*</sup>, Sheng Ye<sup>[2]\*</sup>, Woon Yong Sohn<sup>[3][4]</sup>, Zhenhua Pan<sup>[1][4]\*</sup>

<sup>[1]</sup> Department of Applied Chemistry, Graduate School of Engineering, University of Hyogo, Himeji, Hyogo 671-2280, Japan.

<sup>[2]</sup> Anhui Engineering Research Center of Carbon Neutrality, The Key Laboratory of Functional Molecular Solids, Ministry of Education, College of Chemistry and Materials Science, Anhui Normal University, Wuhu, Anhui 241002, China.

<sup>[3]</sup> Department of Chemistry, Chungbuk National University, Chungdae-ro 1, Cheongju, Chungbuk 28644, Korea

<sup>[4]</sup> Chungbuk National University G-LAMP Project Group, Chungdae-ro 1, Cheongju, Chungbuk 28644, Korea

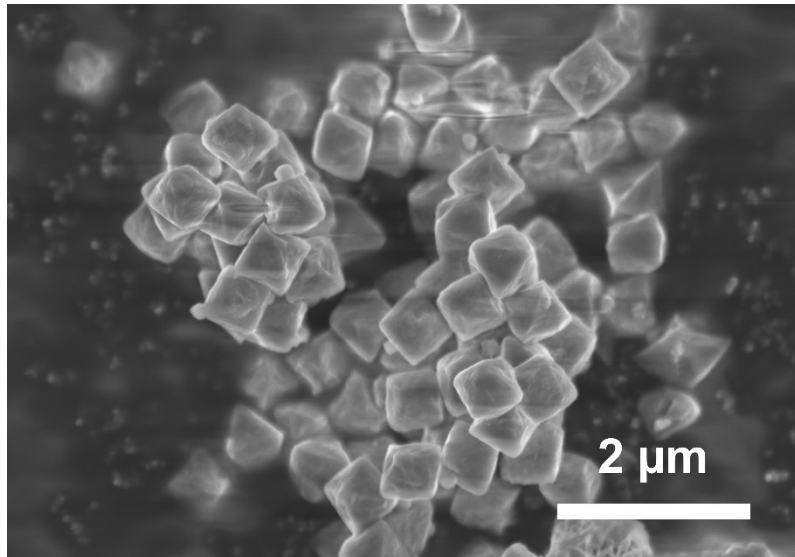

**Figure S1.** SEM image of the UIO-67.

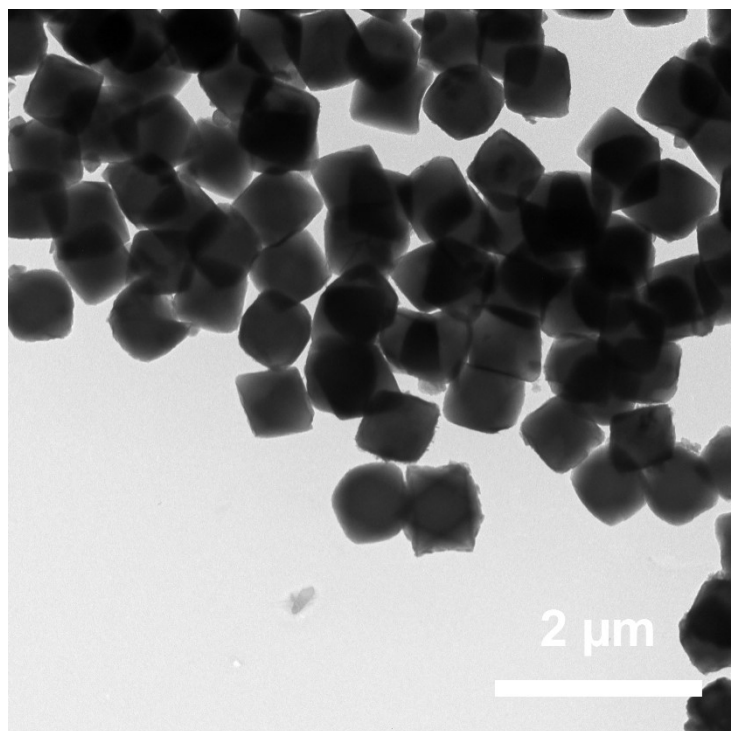

**Figure S2.** TEM image of the UIO-67.

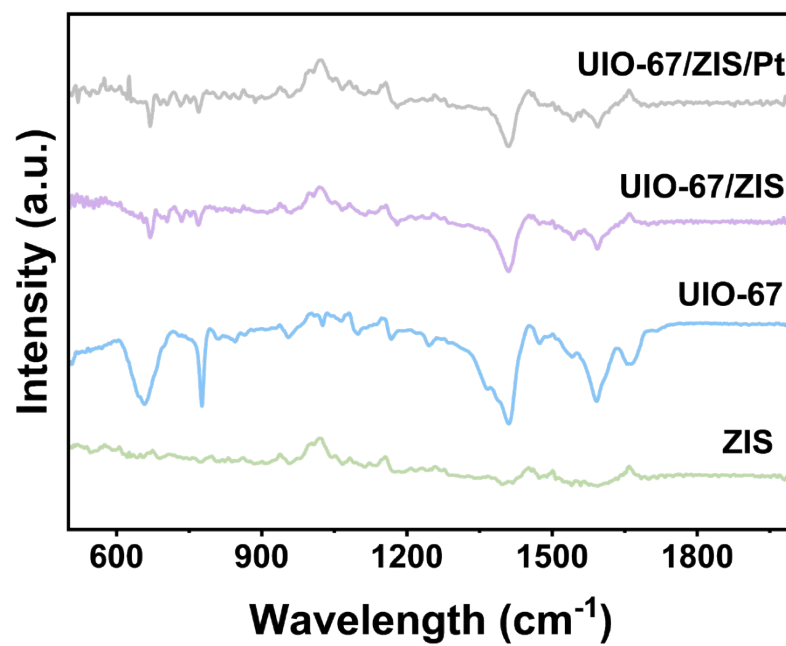

**Figure S3.** FTIR spectra of UIO-67, ZIS, UIO-67/ZIS, and UIO-67/ZIS/Pt.

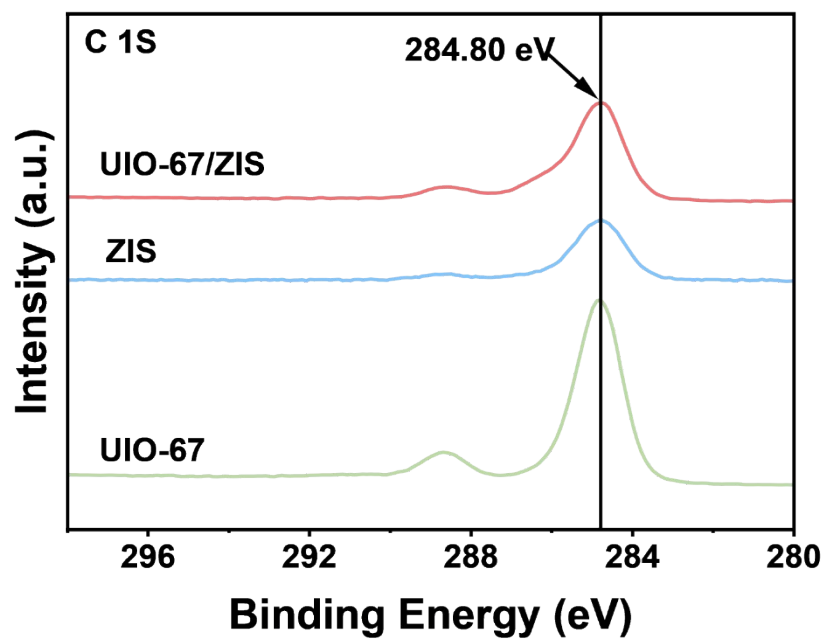

Figure S4. C 1S for UIO-67, ZIS and UIO-67/ZIS.

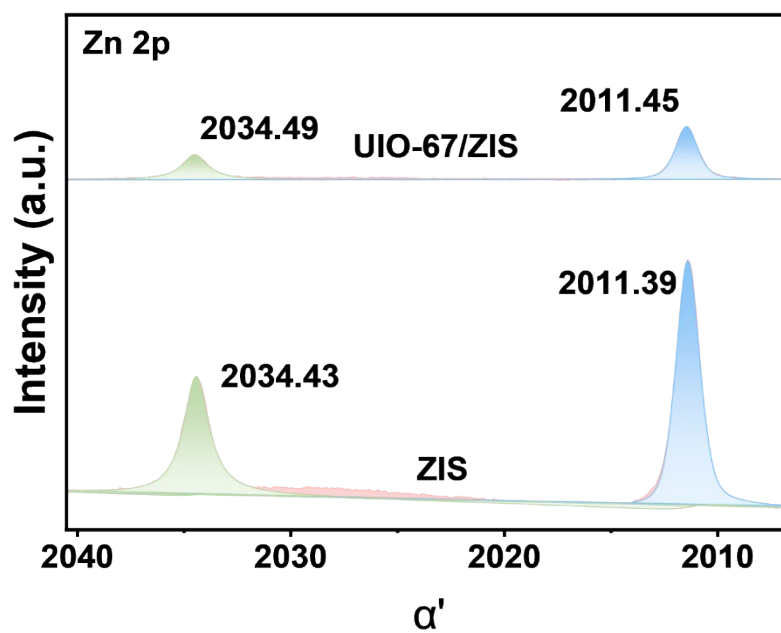

**Figure S5.** Modified Auger parameter ( $\alpha'$ ) of Zn for ZIS and UIO-67/ZIS.  $\alpha'$  = BE (photoelectron peak) + KE (Auger peak).

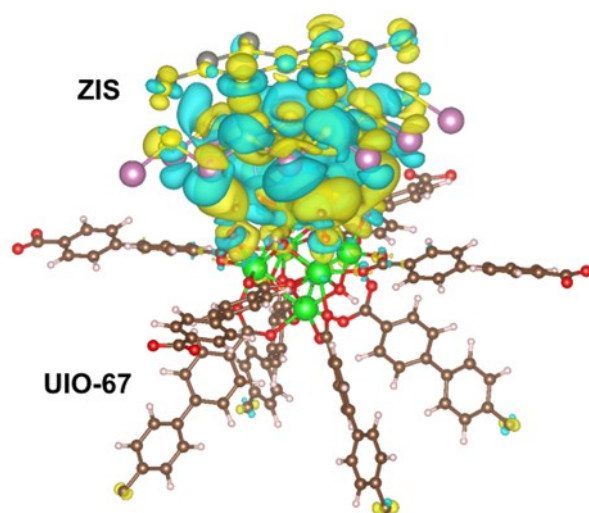

**Figure S6.** Charge density difference of the UiO-67/ZIS interface.

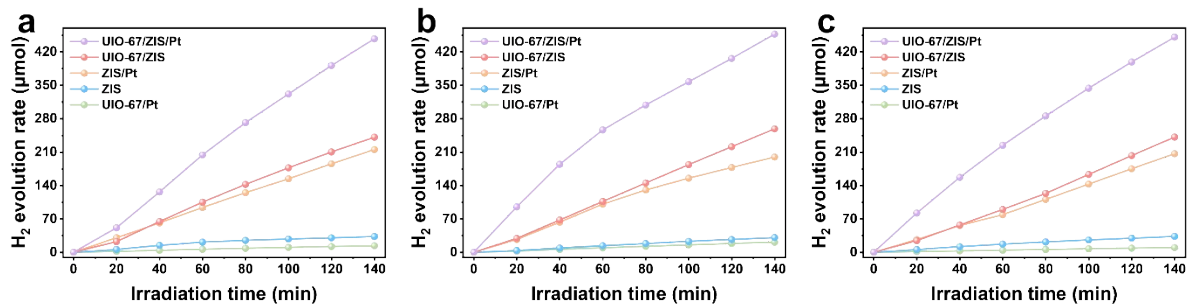

**Figure S7.** Hydrogen evolution data from three parallel experiments.

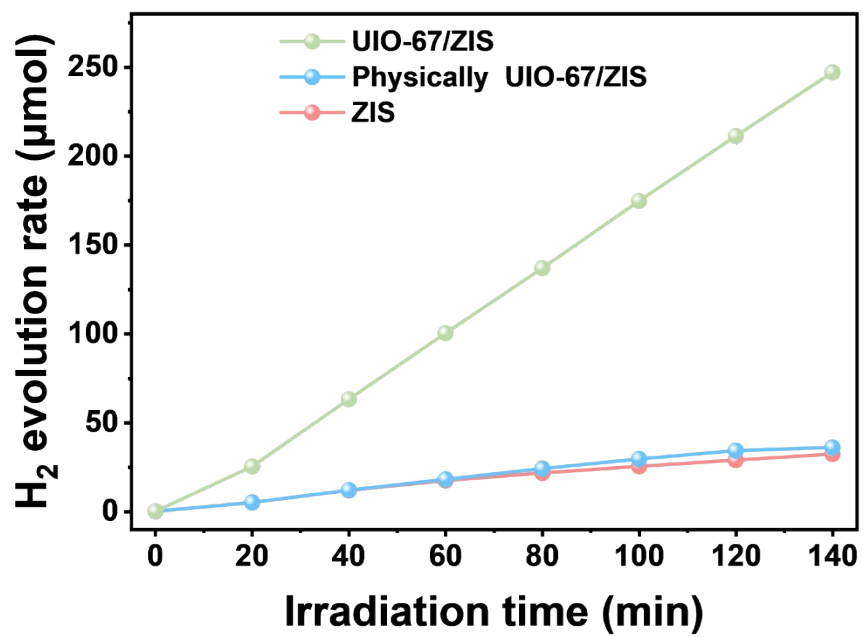

**Figure S8.** Photocatalytic hydrogen production experiment with physically mixed UIO-67/ZIS.

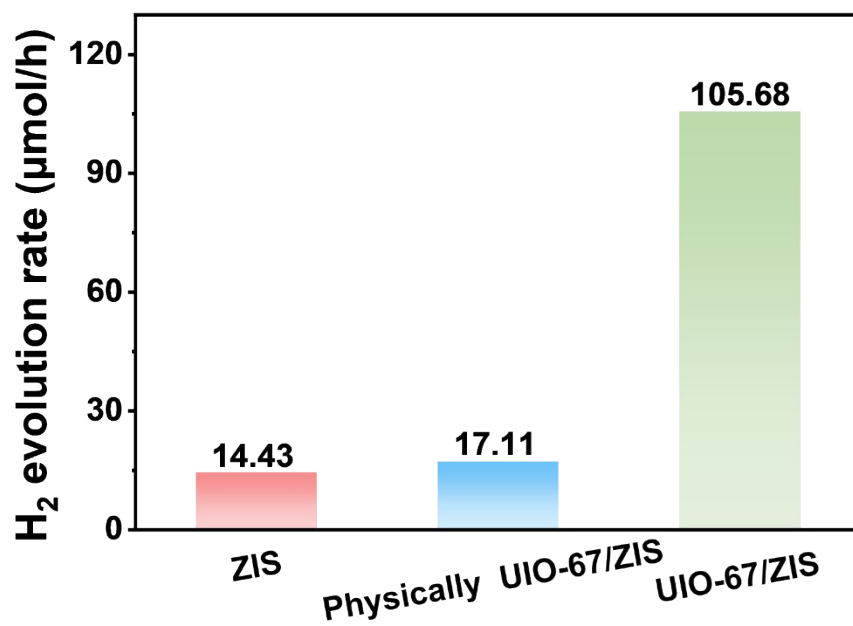

**Figure S9.** Comparison of the photocatalytic H<sub>2</sub> evolution rates of physically mixed UIO-67/ZIS.

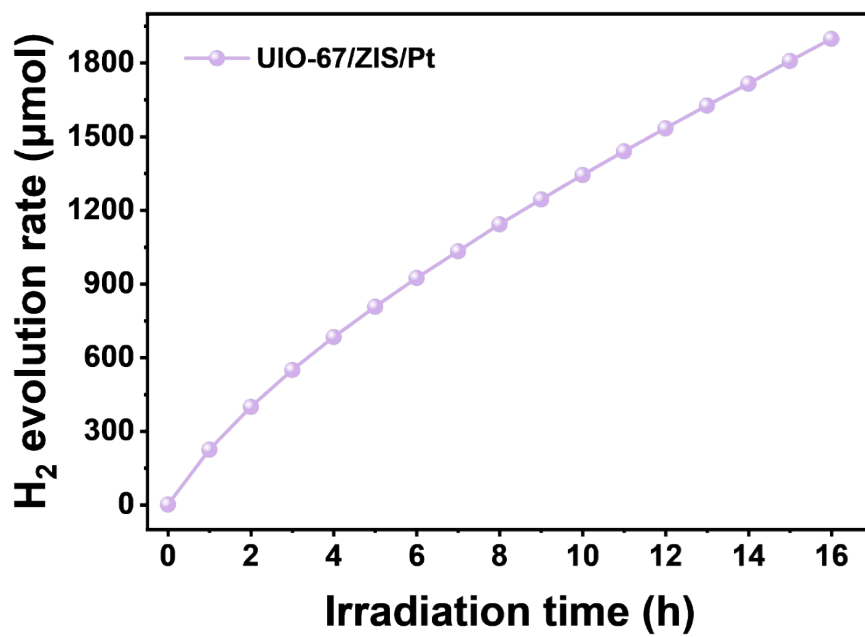

**Figure S10.** Continuous 16 h hydrogen production performance test.

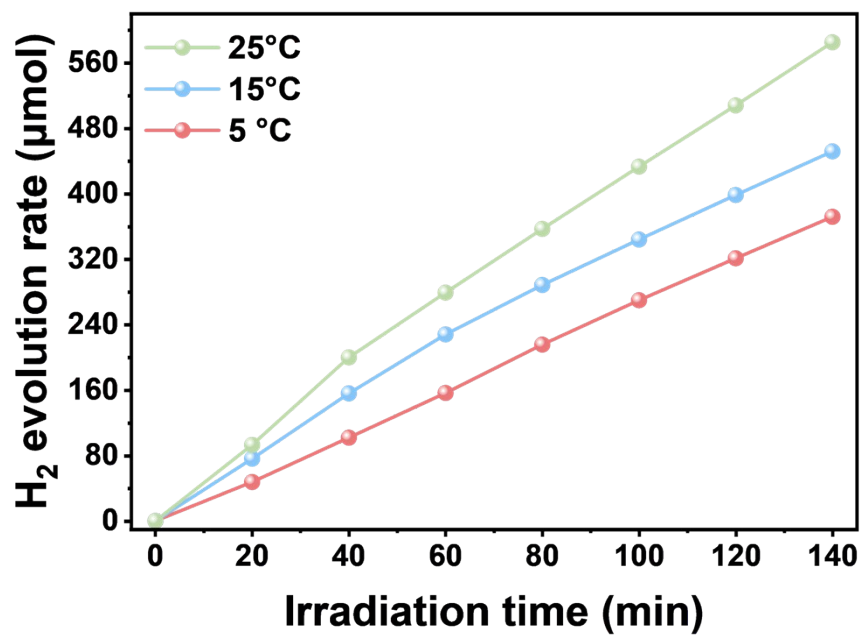

**Figure S11.** Photocatalytic hydrogen production tests at different temperatures. A higher temperature accelerated photocatalytic H<sub>2</sub> evolution because it enhances the kinetics of surface reactions and charge transfer processes.

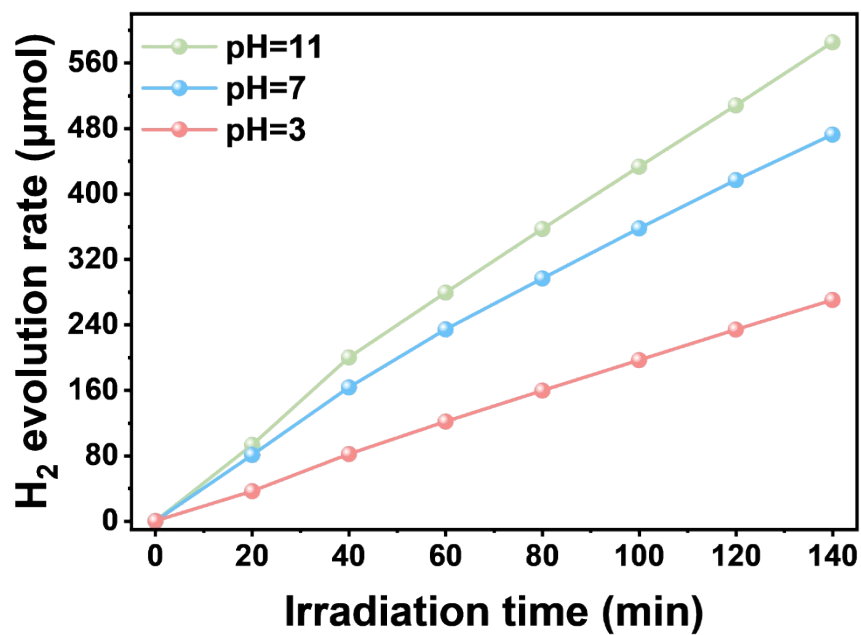

**Figure S12.** Photocatalytic hydrogen production tests at different pH. The enhanced H<sub>2</sub> evolution under alkaline conditions (pH ≈ 11) is mainly attributed to the deprotonated form of triethanolamine, which exhibits stronger hole-scavenging ability and improved adsorption on the catalyst surface, thereby suppressing charge recombination and promoting photocatalytic hydrogen production.<sup>[1]</sup>

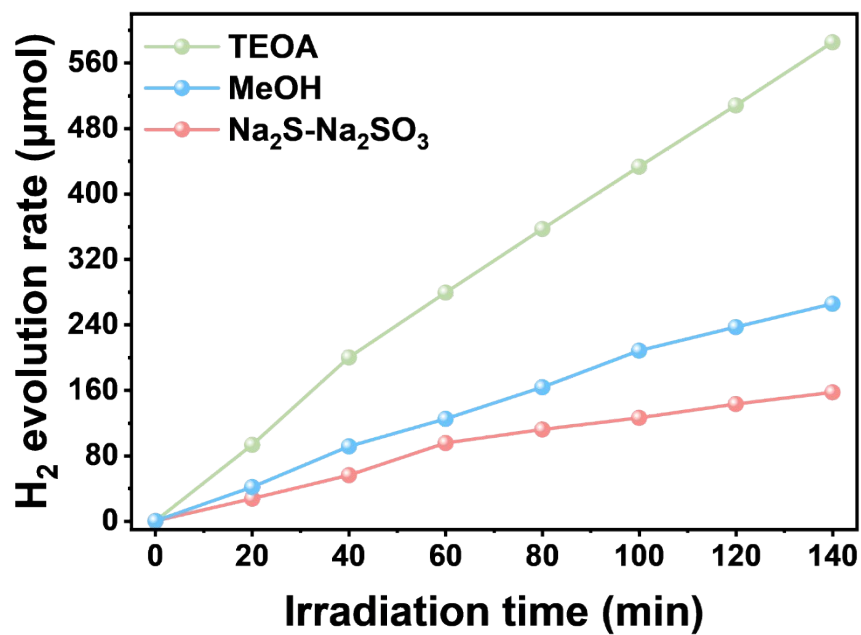

**Figure S13.** Photocatalytic hydrogen production tests at different solvents. The superior performance of TEOA is attributed to its strong hole-scavenging ability and good interaction with the catalyst, while methanol shows moderate activity and Na<sub>2</sub>S–Na<sub>2</sub>SO<sub>3</sub> suffers from side reactions that limit hydrogen evolution efficiency.

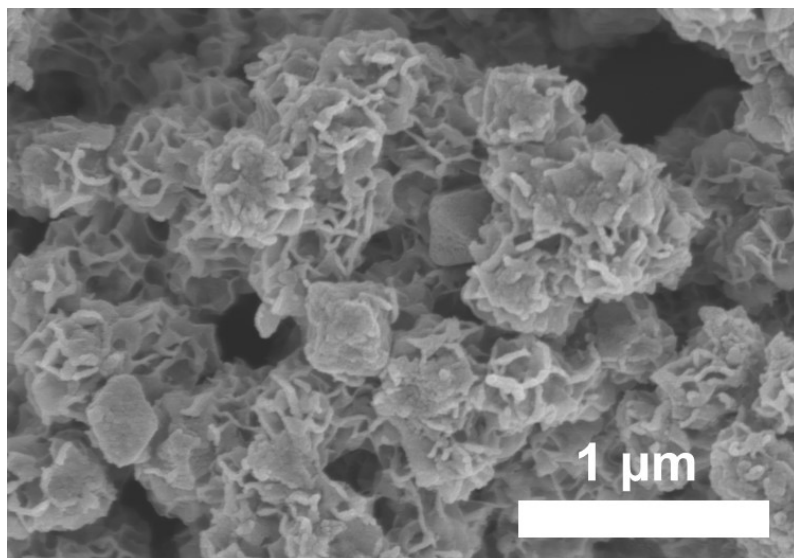

**Figure S14.** SEM image of UIO-67/ZIS/Pt after cyclic reaction.

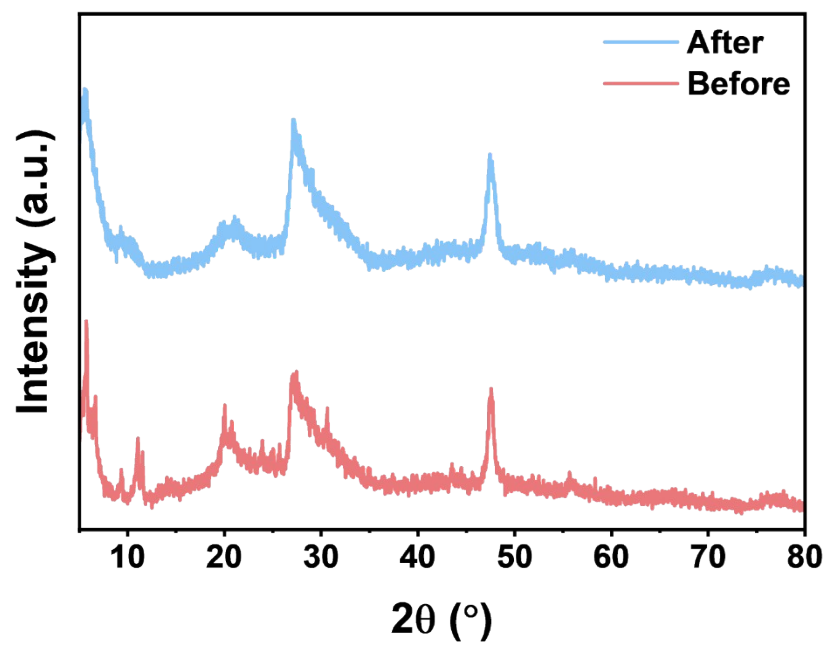

**Figure S15.** XRD of UIO-67/ZIS/Pt after cyclic reaction.

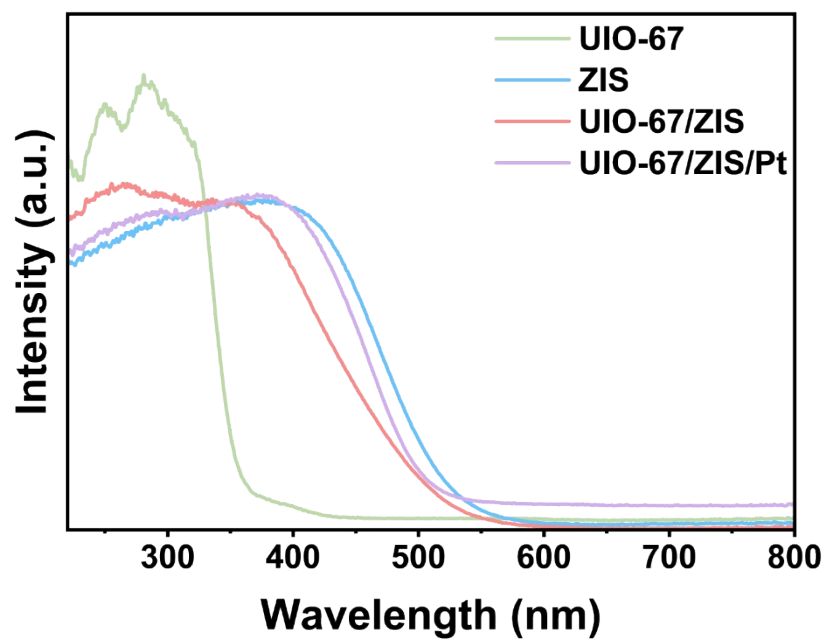

**Figure S16.** UV-vis diffuse reflectance spectra of UIO-67, ZIS, UIO-67/ZIS, and UIO-67/ZIS/Pt.

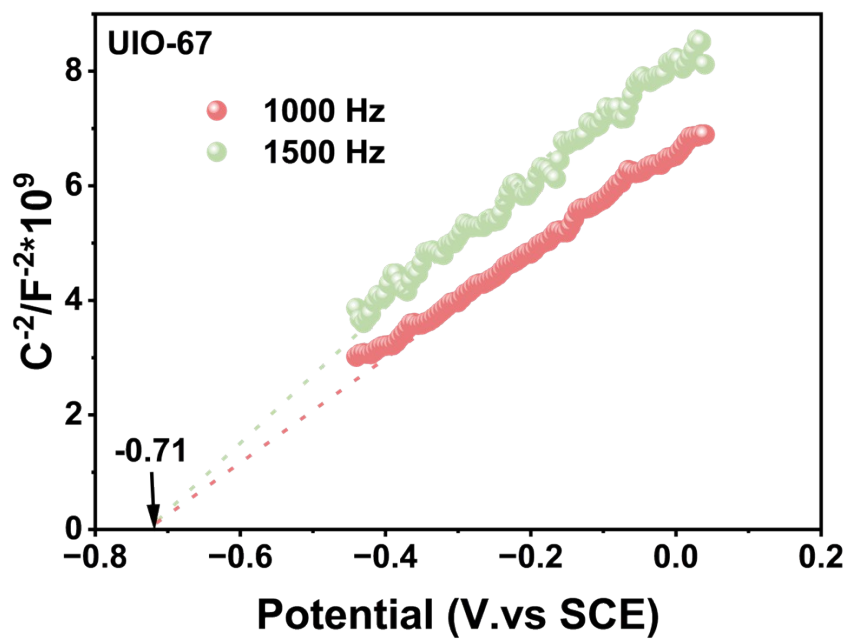

Figure S17. Mott-Schottky measurements of UIO-67.

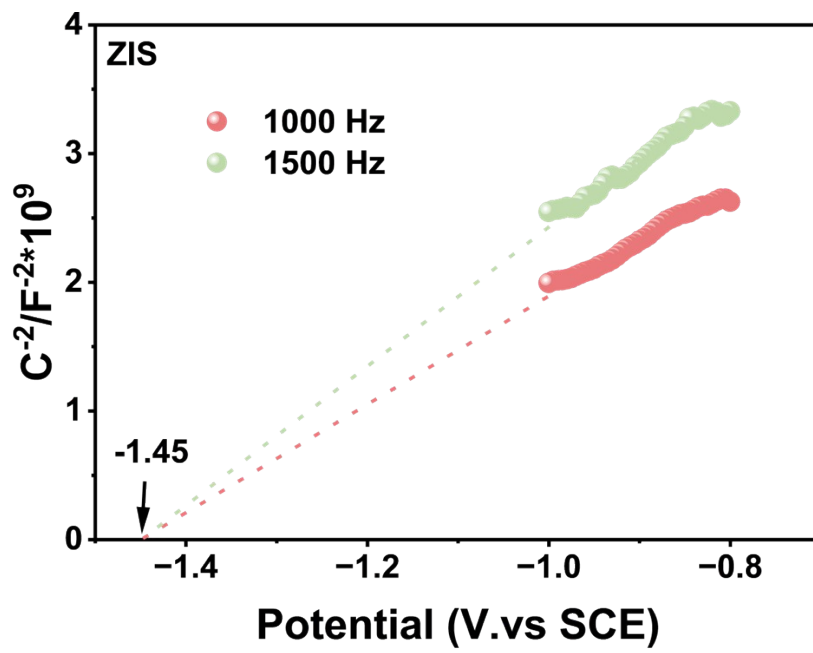

Figure S18. Mott-Schottky measurements of ZIS.

**Table S1.** COMSOL Multiphysics Simulation Parameters for UIO-67

| Parameters                               | Values                                                    |
|------------------------------------------|-----------------------------------------------------------|
| Relative dielectric constant             | 4 <sup>[2]</sup>                                          |
| Band gap                                 | 3.6 eV                                                    |
| Electron affinity                        | 4.3 V <sup>[3]</sup>                                      |
| Effective state density, valence band    | 1*10 <sup>24</sup> m <sup>-3</sup> <sup>[4]</sup>         |
| Effective state density, conduction band | 1*10 <sup>23</sup> m <sup>-3</sup> <sup>[4]</sup>         |
| Electron mobility                        | 1*10 <sup>-8</sup> [m <sup>2</sup> /(V*s)] <sup>[5]</sup> |
| Hole mobility                            | 1*10 <sup>-8</sup> [m <sup>2</sup> /(V*s)] <sup>[5]</sup> |
| Model width                              | 150 nm                                                    |
| Model height                             | 50 nm                                                     |

**Table S2.** COMSOL Multiphysics Simulation Parameters for ZIS

| Parameters                               | Values                                                                     |
|------------------------------------------|----------------------------------------------------------------------------|
| Relative dielectric constant             | 4.7 <sup>[6]</sup>                                                         |
| Band gap                                 | 2.5 eV                                                                     |
| Electron affinity                        | 3.8 V <sup>[6]</sup>                                                       |
| Effective state density, valence band    | $2.3 \times 10^{25} \text{ m}^{-3}$ <sup>[6]</sup>                         |
| Effective state density, conduction band | $1.8 \times 10^{24} \text{ m}^{-3}$ <sup>[6]</sup>                         |
| Electron mobility                        | $1.07 \times 10^{-2} \text{ [m}^2/(\text{V}\cdot\text{s})]$ <sup>[6]</sup> |
| Hole mobility                            | $1 \times 10^{-3} \text{ [m}^2/(\text{V}\cdot\text{s})]$ <sup>[6]</sup>    |
| Platinum is a work function              | 5.65 V                                                                     |
| Model width                              | 100 nm                                                                     |
| Model height                             | 10 nm                                                                      |

**Table S3.** Comparison of H<sub>2</sub> evolution performance over ZIS-based heterojunction photocatalysts.

| Samples                                                               | Condition                                                                  | H <sub>2</sub> evolution Rate<br>(mmol.g <sup>-1</sup> .h <sup>-1</sup> ) | AQY                  | stability | Ref.      |
|-----------------------------------------------------------------------|----------------------------------------------------------------------------|---------------------------------------------------------------------------|----------------------|-----------|-----------|
| <b>UIO-67/ZIS/Pt</b>                                                  | TEOA<br>(Solar simulator)                                                  | 7.97                                                                      | 5.94% at<br>380 nm   | 16 h      | This work |
| <b>ZnIn<sub>2</sub>S<sub>4</sub>/FeWO<sub>4</sub></b>                 | Na <sub>2</sub> SO <sub>3</sub> and Na <sub>2</sub> S<br>(Solar simulator) | 3.53                                                                      | 19% at<br>420 nm     | 20 h      | [7]       |
| <b>Co<sub>3</sub>O<sub>4</sub>/ZnIn<sub>2</sub>S<sub>4</sub></b>      | TEOA<br>(λ > 420 nm)                                                       | 3.84                                                                      | 8.51% at<br>380 nm   | 20 h      | [8]       |
| <b>K-g-C<sub>3</sub>N<sub>4</sub>/ZnIn<sub>2</sub>S<sub>4</sub></b>   | TEOA<br>(Solar simulator)                                                  | 0.51                                                                      |                      | 12 h      | [9]       |
| <b>ZnIn<sub>2</sub>S<sub>4</sub>@Ni-MOF</b>                           | TEOA<br>(λ > 420 nm)                                                       | 1.82                                                                      |                      | 36 h      | [10]      |
| <b>Cu<sub>2</sub>CoSnS<sub>4</sub>/ZnIn<sub>2</sub>S<sub>4</sub></b>  | Methanol<br>(λ > 420 nm)                                                   | 4.90                                                                      | 17.76% at<br>350 nm  | 12 h      | [11]      |
| <b>CoFe<sub>2</sub>O<sub>4</sub>@ZnIn<sub>2</sub>S<sub>4</sub></b>    | TEOA<br>(λ > 420 nm)                                                       | 1.58                                                                      | 0.0047%<br>at 420 nm | 16 h      | [12]      |
| <b>ZnFe<sub>2</sub>O<sub>4</sub>@ZnIn<sub>2</sub>S<sub>4</sub>/Au</b> | TEOA<br>(λ > 420 nm)                                                       | 1.15                                                                      | 0.11 % at<br>420 nm  | 16 h      | [13]      |
| <b>ZnIn<sub>2</sub>S<sub>4</sub>/TpPa-1</b>                           | L-ascorbic acid<br>(λ > 420 nm)                                            | 2.75                                                                      | 4.67 % at<br>420 nm. | 24 h      | [14]      |

|                                                                   |                                                                                |      |                      |      |      |
|-------------------------------------------------------------------|--------------------------------------------------------------------------------|------|----------------------|------|------|
| <b>ZnIn<sub>2</sub>S<sub>4</sub>/Co<sub>3</sub>Se<sub>4</sub></b> | Na <sub>2</sub> SO <sub>3</sub> and Na <sub>2</sub> S<br>( $\lambda > 400$ nm) | 2.46 | 2.11 % at<br>420 nm. | 12 h | [15] |
| <b>ZnO/ZnIn<sub>2</sub>S<sub>4</sub></b>                          | TEOA<br>(Solar simulator)                                                      | 1.99 | 7.4 % at<br>350 nm.  | 20 h | [16] |
| <b>ZnIn<sub>2</sub>S<sub>4</sub>/h-BN</b>                         | Na <sub>2</sub> SO <sub>3</sub> and Na <sub>2</sub> S<br>(10 W LED lamp)       | 3.61 | 13.21 %<br>at 365 nm | 25 h | [17] |

- [1]. R. Yang, K. Song, J. He, Y. Fan, R. Zhu, *ACS Omega*, 2019, **4**, 11135–11140.
- [2]. S. Balčiūnas, D. Pavlovaitė, M. Kinka, J.-Y. Yeh, P.-C. Han, F.-K. Shieh, K.C.-W. Wu, M. Šimėnas, R. Grigalaitis, J. Banys, *Molecules*, 2020, **25**, 1962.
- [3]. X. Wang, W. Sun, Y. Tian, K. Dang, Q. Zhang, Z. Shen, S. Zhan, *Small*, 2021, **17**, 2100367.
- [4]. M. Treger, C. König, P. Behrens, A.M. Schneider, *Phys. Chem. Chem. Phys.*, 2023, **25**, 19013.
- [5]. T.D. Musho, A.S. Yasin, *J. Electron. Mater.*, 2018, **47**, 3692.
- [6]. N. Yang, Z. Yin, Z. Chen, C. Gao, Z. Cao, Y. Zheng, Z. Pan, H. Cao, S. Ye, Y. Xiong, *Angew. Chem. Int. Ed.*, 2025, **64**, e202502202.
- [7]. D. Kong, X. Hu, J. Geng, Y. Zhao, D. Fan, Y. Lu, W. Geng, D. Zhang, J. Liu, H. Li, X. Pu, *Appl. Surf. Sci.*, 2022, **591**, 153256.
- [8]. Y. Zhang, D. Chen, N. Li, Q. Xu, H. Li, J. Lu, *Appl. Surf. Sci.*, 2023, **610**, 155272.
- [9]. Z. Cui, X. Kuang, R. Lv, X. Jin, F. Chen, Y. Kang, H. Zhang, H. Duan, B. Cao, *Mater. Res. Bull.*, 2025, **192**, 113580.
- [10]. K. Song, H. Lin, Q. Guo, F. Liao, C. Zeng, *Appl. Catal. A*, 2026, **710**, 120680.
- [11]. Z. Shi, W. Jin, Y. Sun, X. Li, L. Mao, X. Cai, Z. Lou, *Chin. J. Struct. Chem.*, 2023, **42**, 100201.
- [12]. W. Ge, J. Song, S. Deng, K. Liu, P. Yang, *Sep. Purif. Technol.*, 2024, **328**, 125059.
- [13]. J. Song, W. Ge, S. Deng, J. Tang, S. Deng, P. Yang, *Colloids Surf. A*, 2025, **705**, 135705.
- [14]. S.-D. Wang, L.-Y. Huang, L.-J. Xue, Q. Kang, L.-L. Wen, K.-L. Lv, *Appl. Catal. B*, 2024, **358**, 124366.
- [15]. D. Zhang, D. Zhang, Y. Zhao, F. Zhao, X. Pu, H. Li, J. Liu, X.-Y. Ji, *J. Alloys Compd.*,

2024, **1008**, 176736.

[16]. L. Zhou, Q. Fang, M. Liu, S. Farhan, S. Yang, Y. Wu, *Inorg. Chem.*, 2024, **63**, 21202.

[17]. P. Zou, Z. Wu, S. Ma, G. Cao, X. Jiang, H. Wang, *Appl. Surf. Sci.*, 2025, **697**, 163017.
